# Supplementary material for: Neuronally Derived Extracellular Vesicle α-Synuclein as a Serum Biomarker for Individuals at Risk of Developing Parkinson Disease
Source: PubMed Central journal article supplement (PMC10696516; doi:10.1001/jamaneurol.2023.4398), 2023-12-04
Supplement: jamaneurol-e234398-s002.pdf [file jamaneurol-e234398-s002.pdf]

## Data Sharing Statement

Yan. Neuronally Derived Extracellular Vesicle  $\alpha$ -Synuclein as a Serum Biomarker for Individuals at Risk of Developing Parkinson Disease. *JAMA Neurol.* Published December 04, 2023. doi:10.1001/jamaneurol.2023.4398

### Data

**Data available:** Yes

**Data types:** Deidentified participant data

**How to access data:** Clinical data for the PPMI cohort should be requested via the PPMI portal (<https://www.ppmi-info.org/>).

**When available:** With publication

### Supporting Documents

**Document types:** None

### Additional Information

**Who can access the data:** Anonymized individual participant data and the study protocol will be shared with qualified parties on request to the corresponding author (George Tofaris).

**Types of analyses:** For biomarker or related studies

**Mechanisms of data availability:** By request to the corresponding author.
